# Supplementary material
Source: PubMed Central journal article supplement (PMC5808944)
Supplement: NIHMS940316-supplement-Supporting_table.pdf [file NIHMS940316-supplement-Supporting_table.pdf]

|                        | Aortic Arch<br>(axial) | Aortic Arch<br>(longitudinal) | Carotid<br>Bifurcation<br>(axial) | Carotid<br>Bifurcation<br>(longitudinal) |
|------------------------|------------------------|-------------------------------|-----------------------------------|------------------------------------------|
| Echo time (ms)         | 2.5                    | 3.5                           | 2.5                               | 4.3                                      |
| Repetition time (ms)   | 111                    | 79                            | 163                               | 349                                      |
| Flip angle (deg)       | 35                     | 17                            | 35                                | 32                                       |
| Slice thickness (mm)   | 0.8                    | 0.4                           | 0.8                               | 0.4                                      |
| FOV (mm <sup>2</sup> ) | 30 x 30                | 30 x 30                       | 30 x 30                           | 30 x 30                                  |
| Matrix                 | 256 x 256              | 300 x 300                     | 256 x 256                         | 300 x 300                                |
| Number of Averages     | 4                      | 8                             | 2                                 | 4                                        |
| Imaging BW (kHz)       | 25                     | 25                            | 25                                | 25                                       |

Supporting Table S1
