# Supplementary material
Source: PubMed Central journal article supplement (PMC5808944)

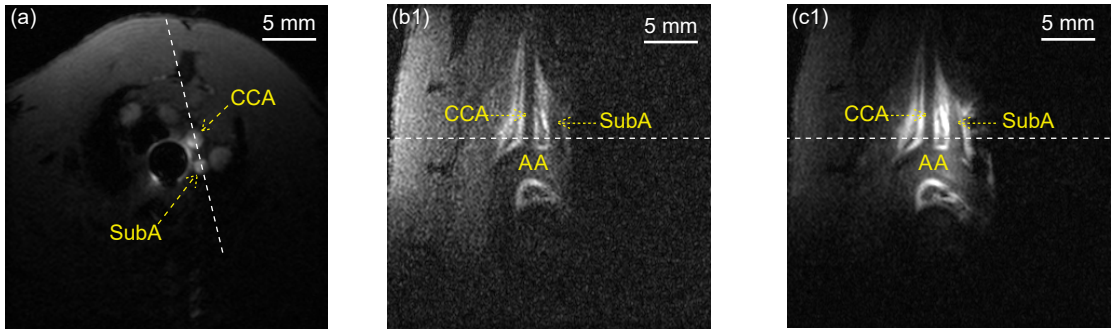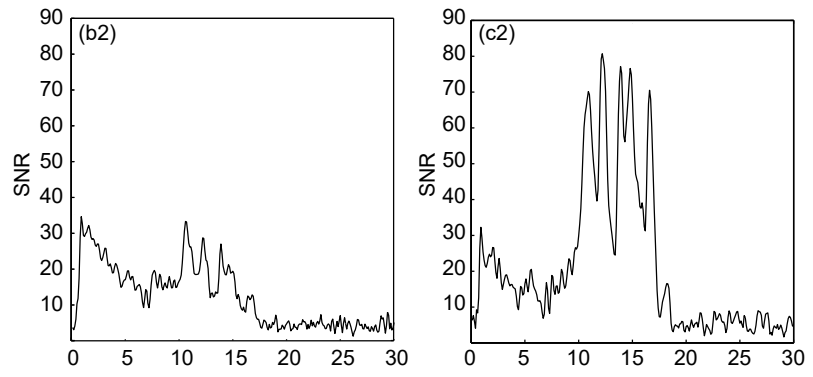

Supporting Figure S2

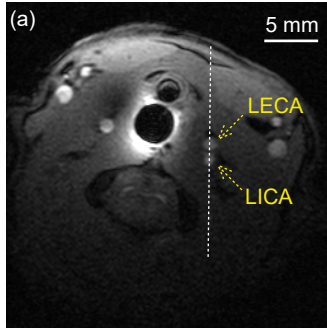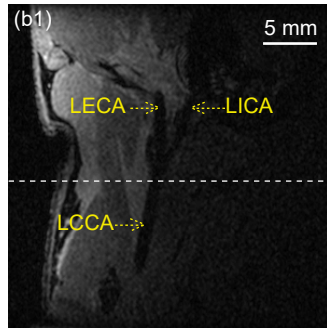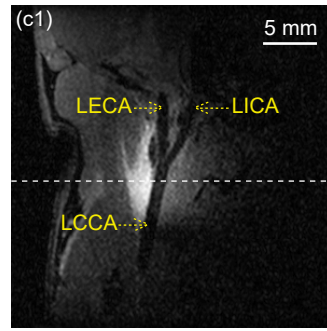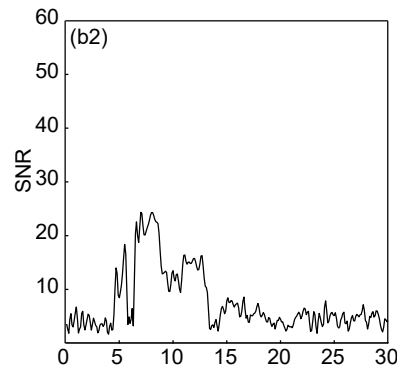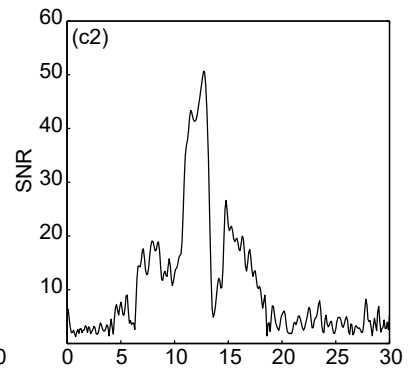

Supporting Figure S3

Supplement: NIHMS940316-supplement-Supporting_figure.pdf [file NIHMS940316-supplement-Supporting_figure.pdf]
